# Supplementary material for: LcNAC13 Physically Interacts with LcR1MYB1 to Coregulate Anthocyanin Biosynthesis-Related Genes during Litchi Fruit Ripening
Source: PubMed Central journal article supplement (PMC6523642; doi:10.3390/biom9040135), 2019-04-04
Supplement: biomolecules-09-00135-s001.pdf [file biomolecules-09-00135-s001.pdf]

## Supplementary material

Article

# LcNAC13 physically interacts with LcR1MYB1 to co-regulate anthocyanin biosynthesis-related genes during litchi fruit ripening

Guoxiang Jiang<sup>1,2</sup>, Zhiwei Li<sup>1,3</sup>, Yunbo Song<sup>1</sup>, Hong Zhu<sup>1</sup>, Sen Lin<sup>4</sup>, Riming Huang<sup>5</sup>, Xuewu Duan<sup>1,2\*</sup>, Yueming Jiang<sup>1,2</sup>

<sup>1</sup> Guangdong Provincial Key Laboratory of Applied Botany, South China Botanical Garden, Chinese Academy of Sciences, Guangzhou 510650, China; gxjiang@scbg.ac.cn (G.J.); lizhiwei@scbg.ac.cn (Z.L.); ybsong@scbg.ac.cn (Y.S.); zhuhong@scbg.ac.cn; ymjiaing@scbg.ac.cn (Y.J.)

<sup>2</sup> Key Laboratory of Post-Harvest Handling of Fruits, Ministry of Agriculture, Guangzhou 510650, China

<sup>3</sup> University of Chinese Academy of Sciences, Chinese Academy of Sciences, Beijing 100049, China

<sup>4</sup> School of Biomedical Engineering, Wenzhou Medical University, Wenzhou 325027, China. lin\_sen@wmu.edu.cn

<sup>5</sup> Guangdong Provincial Key Laboratory of Food Quality and Safety, College of Food Science, South China Agricultural University, Guangzhou 510642, China; huangriming@scau.edu.cn

\* Correspondence: xwduan@scbg.ac.cn

**Table S1.** Primers used for gene cloning and quantitative real-time PCR analysis

| <b>Assay</b> | <b>Gene</b>     | <b>Forward (5'-3')</b>    | <b>Reverse (5'-3')</b>    |
|--------------|-----------------|---------------------------|---------------------------|
| RT-PCR       | <i>LcNAC13</i>  | ATGGTTCACACGAAGAACCCTGAAT | TCCTTGGAACTGGAGATGAGGGCTC |
|              | <i>LcR1MYB1</i> | ATGAATAATCTGTCTCAGTATGAAC | TCAAGCAACACTGATAATGCTACCG |
| qRT-PCR      | <i>LcR1MYB1</i> | ACCTGCCTTCCCTGTAGTATTG    | TCGGACGGATGAGATTTGC       |
|              | <i>LcCHS1</i>   | CCATCATTGTTGGGTCAGA       | TGAGGAGGTGGAATGTGAG       |
|              | <i>LcCHS2</i>   | GACATTGTGGTGGTGGAGGT      | TATTTAGCGAGACGGAGGAC      |
|              | <i>LcCHI</i>    | CCTCTATCCTTTTCACACAATC    | CGTCTTCAGGCTTCTTATCAT A   |
|              | <i>LcF3H</i>    | CTGCAACTCTCACAGCTCTT      | GAAGATACCCCAGTCCTCAC      |
|              | <i>LcF3'H</i>   | GTGAGATACTGGAGGAGCATAA    | TACAGTGCTTGATGTGGTGTC     |
|              | <i>LcDFR</i>    | ATAAAGCCAACATCAATGGGAT    | AGCCCATATCACTCCAGCAAGT    |
|              | <i>LcMYB1</i>   | GTTGGTCCCTTCAATCTTATC     | GAAGACGAGGACTCCAACAC      |
|              | <i>LcNAC1</i>   | CTTCTATGCCGCAGGTTT        | TCACTGTCTAAACCCGAAC       |
|              | <i>LcNAC2</i>   | GATGATTGGGTATTGTGC        | TGACTTTGGACCTCCTTATT      |
|              | <i>LcNAC3</i>   | GAGGTTGCTCCTGTTTGTC       | GACTGGCTCAGGAAGGATA       |

|                |                        |                        |
|----------------|------------------------|------------------------|
| <i>LcNAC4</i>  | AATGGAGCCTATTGAGC      | GCGACTGGAGGATGTAA      |
| <i>LcNAC5</i>  | CAAGGGATGGTGAGATTAGG   | TAGAAAGGTGGAGGAGCAAG   |
| <i>LcNAC6</i>  | AGAAGCCCATCATAGGCACTCG | CCGTCACTAAATGGAGGGTTGG |
| <i>LCNAC7</i>  | GCAGTAAGCGGTCAAGGATA   | GTCACAGGCAGTACCACAAG   |
| <i>LcNAC8</i>  | TTCCATAGAGGCAAAGCACCAA | TGTCATCATCATCATCCCAATC |
| <i>LcNAC9</i>  | CCCAACTGGAAACAAACCTCA  | TCATCCCAGTTTCCATTAC    |
| <i>LcNAC10</i> | AGAGCACCGACTCGTCTACC   | CGGATACTTCCTGTCCCTTG   |
| <i>LcNAC11</i> | CTTTCCACGCATCTCCTTCT   | GCTGTTGCCAGTTCTTGTTG   |
| <i>LcNAC12</i> | GCTACCAAACGGGTCTGAAT   | TGAGAATTGCTCCACCTTGC   |
| <i>LcNAC13</i> | CGTGGAGAACAACCTCAAGCG  | TTGGAACTGGAGATGAGGG    |

---

<*LcCHS1*-promoter

ATAGGAACCTTATTTTCATGGGTATATTTTTTTCTTCAATTTAAAAAATTTGTAAATGTT  
TCTAATAACTATATCATTGTAATAATTCTGGATTAGAAATGGGAAGGATTTTATAGTC  
ATAGAAAAGTCAGTTTTTTCTTAGAAGCAAGGCAAACCTATTCAACTACCGAATTCAAG  
TGTTTTATTTAATTTGATATCTTTTTACTATGGCTTCCTTACTTTTACAATATTGGGGAG  
AGGTTTTTCCATACCTTTTTAGTAAATATGAAATATAAGACTTGAATCTTTCATCTCAA  
TATAAAAGAGAAATTACACATCACCTAGGCAAATTTAGGTTAGTTTTACAATATTTA  
GTTGTAGGTGTAATGGTCTTTGACATTAATAAATATTGGAATATAAGCATAAAGTTA  
TTTTGAATCAAGAAAACTTTATCATCCCTTTGACCAATAGCAAAAATAACAATGTAA  
TTTGAATAAATAAAATTTTTCTGCAAAGTTTTTAACTAATTTCATAATCATATGATT  
ATTTCTTAATTTAATCGATCTTAGGGGGCTTTGAAATTTCTCTCTTGAATTTGAAACTA  
GACATGGATATCAATAATAAAAATCAACCAATAAAGTAGGGATTGGAGATTTCCATG  
GGATATCTATAATATAAACAACCACTAGCAAGGGATGATTATTATCATTGTGGCTAAG  
GTAGCAGGAGACTTTTGTCTAAGTTCTTAACTAATTTTAAAGTTGTATGGTTGTTTGTCA  
ATTTTAGTTAAGACTAAAGGGCTGTTTTGAAATTTGCCCTTGAATATAAAATGATTCA  
TTAATGCGATATAAATTAACCATTAATTAATAACTAAAGACTAAAACCCCATGCGCAGG  
AGGACTTTTTACCTGTTGTTTCGACAGGACAGCGAGGACTCTTAGTTTCAAAGTAATG  
TAATTATATTTTCAGTTGTACTCAAATCTGAAAGAGAATTTTTTCCCTTAAATCTAAAA  
TGCAACAAGATTTTAATACAAATCATGCATCAAACCTACAGATTTTTCTGAAGATTTCA  
TCGGATCATATTAGTAAGTAATACAGAATTATTTGGTTTAGAATCCAAGTAAATTATT  
ACATTTACTGAATTATAATTTTATCAACATAAATAGAAAGTTGATACTTGTATAGTA  
AATTTCCAAGTAAATTATGATCTCATTAAAGAAGTTACCGTCTAATTTTATTTTATTT  
TCTTTTCATATAAAAGTTATCTCAAATTTGAAAATCCTATAAGATCTATGCTAATATA  
AGACATAACCTTTATGCCTTACCTTAAAAAGAGGCTACTCATTGGGGTCACTATTAAT  
TACCTATCATTCCCTTTGTTGTGTAATCCTCCTAACATTACACATTATGGGTACACACCTT  
TTCATAAAATTACTTATTAATGTGTGATTTTTAGAACTTAATACAAATTTTGACTATA  
TACACATATCATGTTTTGAATTATTGAAGAAAAATTTCAGAACTTACTTGACAATAAA  
CACAGTTATTAATTTACGTATACCTTAAAGAAAGCTCGTGATAATCCACAAATGAAAAT  
ATAAAATCCTAGTTTGTAACTAATTCATGAATTGTGGCCATTCAATTGTCTTGACTA  
ATTGCATCAGTACCTTGATGAATGAACCTAATGTGGTAAGTGAGAAGAGCTTGCTAG  
CTACAACCTCATATCATGTGGAGGATAGACAGGCAAGTAAGCGAACGTTTTATAGA  
**TAGATACACCAAACACCTTTGT CACGTGCCAGCCAGCGGCTGCCCAACCGAGTTGT**  
TGAGTCATTTTGGATCTTGTACAACCTATCGGATTGGTTCGATCACGTGATCTTCAGCTA  
CCCACATCTCCCACTCTTATATATGTGCAACTAAAACATTTTTTTTTTTCATACTACTTC  
CTCTCTCACACATACAAAATCTCTAAGACCTAGCAGCTGGTCCCTCGATTGTGATCAA  
AACTGCACCACAGGATCTTCACAGCCAGTTTTGATCAGTTTTTCTCTTGAAGCTAGGG  
AAAAATG

<*LcCHS2*-promoter

TGTTTATTACTGAATTTAAATGAGTCAGTCTCAACTCATATTTCAAACCTTCTATCTT  
AATAAATGTTATGGTACCTGGTGAATATATATTTTTGTAAGTGAAATTAATTGTTATC

AATGTATATACATTCCACCAATTGCTACATCATTAAATTGGATGCATGTATGATATGAAA  
TGTGAGATGTCCAATATTATTTAATTTAAATATATTCCTTTTTTTTTGAAACATTAATTT  
AAATATATTCAAACCAAGTTTATTAATAAATAAATTCAATCTAACCAATATAAACATAA  
TTAATATATTGAAAGTCGTTTAATTAACACTTTTTGTCTATATAATCCATAATACAAAA  
ATAAAAGTATATTAAGATATGAAATTATTGTATATAGTAACATGTAAGTTACACGTAT  
ATTGTTAAATTCTAAATTTACCTTTAATAATTATGTTGAACTTGTAATCCTTAAGCAA  
ATTTGACACGGTTTGTGGATAAATGAGTTAAACGGGTTGACGTAATTAGGGGAATCA  
AAAATTGAAAATTATCTATTTCTTGTGGTATTGAATTGTACGTTATACTGTGGCTCAA  
TGATCCAAACTATGACATCTATGATCTATCTAATACAATTATCTTGAATTTATATATAA  
TTTAAACTCATAACTGAAAAGCTCATTAAATATAATACAAACGTCATTCAATTTAATT  
ATAAATGCTTGTGTCATTGTTGTAATCTTGATTATTTGGTATATTCCTTGTATATAA  
GGGCATATTGTATATTACTGTGCATGTGCTATTTTATAAGTTGAAGTTGGCATTCAA  
CGATACTTTTTAATTATTTCAATAAATAGACGGTATTTCTATGAAACAGTTCTAAATT  
TCTACTTATACAAAATAGGAAGAATACTTTGCGTTAGTTGACTTCGTAGCGTATTTCTT  
CGATATATGTGTGATTTCCATTACATATTTTCTGGTAGTCAAATGAACAAACATTTG  
GACATAATTTGGTCCTGTCAAGATCAAACTTGTAAGCAAAAATCAAAAACATAAAAA  
ACTAAAATAAGTCGTAAGTATTTCAATTAATTAATTAATTAGATTCAAGTAATTTTC  
AGAAGTATTATTAGAATAACCTAATTTGTCTTGTTTTATTAATATGACAAAATTTGAT  
GATCCAGTTAATTTCTAAAGCAATTACAAGACTCTTTTAATTGTCTTTTTATTATTATT  
ATTATTAATTTCTATTTCCAAAATAGTAACCTTGGATTATATATTTTTCTTTACCGTAA  
TGTCTGAAATATAAAAGAAAAAGAATTTGTGATTCAATATAATTAGTTTTCTTGAAAG  
TTGTTAATCTTGAATTTGGGTTTTTAGGTAGATGGCGTGATCATGTGAC**CGTGATAA**  
**ACCATTTTT**TAGACCTATCAATCTACAATACTTTGAAATATATATATTCCTCAAATAGG  
TGTTAAAGCGATACCTGATAGAATTCTAAAATTACTTCAATTTAAATCCGGACATTAA  
TTATCTCAACAGAGATACATGTACAATTTCTTGATCTTTCTTTGAAGATAAGTTAATT  
TCTTCAATTGAAGTAACTTAATCGTACGAATTAATTGAACCAAGTAAACATGCATGAC  
ATAAATCGACATGTATTGACGATACATGAAACATGGAAGATGAAACGAGATGTGGCA  
TCACAACAACCACTGCTTAATGAGCCTAACACCGAGCCACGTGGTGACGAGCTGCC  
CATTGATCCAACCTACCACTCCCCCTCCTTTAAACCCTACTCAACTAGATTTCTTA  
ACATCTCACTCACCTCCTTTCAAGTACGAGCCAAGCTTCAGGCAGGTACTTTCATTTTT  
TATCACTAAGCACAAAAATG

<*LcCHI*-promoter

CAGAAAATCCGCATTGTAGTTGCTCAGCGATAAGCTTTAGCGCCCTACGT  
GCGATGCAGTAAATCCGTAACGTAGTGGTTGAGATAACTTAGTAAGCTT  
CACGTTGGCGTTAGTTTTAATCGCCCGTGATGGTTAGAATGTTTAAAGGAT  
ATACATGGGGGTTTTGAAAGAAATCATAAAACAAATGATAAATTTTCATG  
TTAGTGTATGTGATATTATATCTTCGTTGCACTAACTATTTGTTTATTTTG  
TAGCTATTTATATTTAATTGTGTGCCACTGCGGACGACAGGTCGTCATCAT  
TTTGTGTGATATATATAGGTGGGCGATCTATGATATATGATGATGTA AAC  
TTTATGGATGAGATGAATAAGTAATTGAGAAACAAATATTCATATTTTGA  
AATTGTATATTTGTAATATTCATGCATTTGATATATATGATGCATCTAGA

TATATTCTACATGAGTTCGTGCTTATGAAAAGAGAATTGAGTGTTGATGTT  
GCATGTTTGAGAATAAAGAAGTTGGGAGGAATGAAATGGGTTGGGAATA  
AAGAAGTTGGGAGGAATTGAGGTTTTAGTCGAAGTGTAATTTCTTGACA  
TGTAATTTTGGTTTATCAAAAATGCAGCCGTTATACTGCCGAAAATTTTA  
TAAAAATATTTGAAATAGAATCGAGAAAAATTTTATCACTCCCAACTAGT  
TTAAAAGAAAACCTGAATTTTTGAGAACAAACGAGTAAACCGGTTGAAGAA  
AGTTAGGGTTTGCTTCTCGGATTTCTTCGATCCGACAAGTCAGTTTCGATA  
AGTCCGTTGAAGTGTCCGGCAGGATCCTCCAGATAAGAGCTTAGATAAGG  
TCTGGGAAGGGTCTGTACATAATCTCCACAATTCATCAACAACCACA  
ATTCATCAATCCAATTAATTAACATCATCATCTCTCACAACAACAACA  
ACATCAAATCATTATAAACTCATTAAATAAACAAAAAAAAAAAAAAAAAAT  
CTGGTTCTGGGTTTCGCGAACCCAGAACCAGTGTTCGATTCTGGGTTACGA  
ACCCAGAACCGATGTGGTTCTGGGTTTCGCGAACCCAGAACCAGATCTGGT  
TTTGGGCTCGGGCAGCAGCCAGAACCATATGGTTCTGGTTTCGACCAGAT  
CCAACCTCAGGAAAAAAAAAAGAGAAAAAAAAAGGAAAGAAGAAGAAGA  
AAAAGAAGAAGAAGAAGAGAGGGAGGAGGGATGAGAATATAGATGGGT  
TAAGGCATTTTAGAGAGAGAATGAGAGGAAAAAATTTGATGGGGTGGGA  
ATTTTAGAGAGAGAATCAGAAATGGGGTGGGTCATTGGAGGGAAAAACC  
ATGGTAAGTGGTAATTAGCTGGACTATTAAGGGTATTTTGGATAAAAAAA  
AATCATGCTGCAGGGAATTAAAAAAAAAAAGGTAATATCCCAAAAGGTTAT  
AAAAAAAAAGGTTAGATTTGGTTAAAACCCTTAAACAGAAAACCTACAGATG  
ATTGGTCTCTTTCAGAACTAAGAGAGGAAAACCAAGTCTTACACAAGAAA  
GCTAGAGTCTTATCTATGTATTCTTGGTATCTGTTGAGTGGAAAATGTTTTT  
GTTGCTTGTCTTGTCTATGTAGCAAGAACTGTGAAAATGTAATCTTTAGCC  
TATGATATGTTTCCCAAACAACAAGAGTTGCAGCATTGTTTATGTAAGTAC  
TTGGAAAAATTTTGTCTATTTATTATGCTTGTATGAATAACAGTTTATGA  
GATGCAACCATCACATATTCACATTGCTGTATGCTAGAGATGTGTGAAGC  
CATTTAATTGGCCAAAATGGAGGCAACTTTTATTGGCTAAAATTGAGGTT  
AGCTTAAGCATGAAGAATTGTTATATATAAAAATCCCTTTTCCTCATCAAG  
TAGCGGTCAATCCATTGTCCCAAGTCCTAATTCCTAGTGTAATTCTCTTCTC  
TTTCTTTAATTCTCTGCTAAAATTTTAGAAAGAGCTTGAATTCTCTTGGT  
TTAATAAAATATTTTTAGTTTTGGTTCACGAATGTTTCCTTTATATTA  
TTTTATCATCTAAATTTTGTATTTACTATTTTTATATTATTTTTTTAATA  
TTATTTTTAATTTTAAATTTACGTTGAGATTAGAATAATATCGATTTTTATC  
ATTTTTATCATAGTGTAGTGTGGGAATATCATCATCAATCATGAGAAGG  
CGCTGGAAAAGAGTACGCAAAATATGGCTGCAGTGATGCCTGCAGACAG  
GCAAATAGTTTCTACCATGATTTACAGTAAATTGATTAGATTTTGATATGA  
TCGACATTCTCAATTATCGATGAAGTAAATAGCCTATTCATGATCTTAA  
**CGTG**TGGTTATGTCAGCCTGTTACATATAGGTTTTTTTTCCCTTCATTA  
TATGAGAGTTGATACCTATTAGCAGAGTCCAATG

<LcF3H-promoter

GTAAAGCAGTTGGCGACTACAAGTGCCAAGCAATCTCCCGCAATGGGAAT  
AACATGACACATCATTGGCTGTTTTGGTTCTTTCCTCTAGAGAAGATTTG  
TCTGGGAGACAGTAAGCTTTGAATGTATTTCCCTTTTTCTGGTTGTATAA  
ATTTTTGTGTAATTTAAAAATATTTATATATCTATGTCATATTCAGTAAGC  
ATTAATTACGCGATTGGGTACTTATCGGTACCGTCGTTCAAACAATTCGA  
TATTGAATAACTTTTATTCTGTAAATAGTATTAGGTTCTGAATAGTAATAT  
TGTTAAATGGATATTAGAAAAATTATATGAATTAATGATGGAAGAATTAT  
GCAACTACAAAGATTAGAGAAATTCTACAGTGGCATCTTTTTCAATTCTGA  
TATAATTGCTTGAATCATTAAATTTTAAAATTTAATAAATACTATTTAACAA  
AAGTTATATCTAGTTGGTTAGCATCCACAAACGTTAAACTTAAATGGTAT  
GTATTAATGTTAATGATACTACATTAATTTAAGGGTTTTACTAATTTATTGT  
TTGGGTAAGAATACCTATCAATAACAATCGTTGCATTAGATGCAAAGATT  
GTTATTGGTGAATATTTAAGAATTATCATTAAATGGATGTTTATAATTTTATT  
TAACTAATAAGATAATAAACCTTTTAAATTTAATAACACCACTTTAAAATTT  
GATAATCTATTATTTAATCAACTATTAACAAGAAAAAGCTTATTTATTIG  
ATTATTTCCAATACCTGTATCTTTTCAGCTTTTAAATTAGGAACAAAAAAT  
ATAAAATTGATGTTGAATTCAGAATTTAGTTATCTTTAAGAATTATAAATT  
TAATCCAAGCCACAATCCATTTATAGTGAATCTGAGCCTCCGATGTTTTT  
TTTTTTAAATATTTAATTAATTCATGAAAGAAATAAACATAATTAACCT  
ACAACTCAATAATGCACCTATAAAACCATAGTACTAAATCAACTTCATT  
AATTATGTTAACGCATTATAACATCAAGTCTTAAATACTATAGTTGGACTA  
TTTTTATCAGTTTAACTTTATCAAACTTAGAGGTCTTTAATTTAACTC  
TCTATCCATTTTATTCATCATCTTGTTCACATGTTATACGGTAAGGAACA  
TTAGCGTGTGTCCATCATCTATTAACATGTTATACGGTAAGAAATATTTA  
ACATATGTCTATCATTTGTTAACTGTC**CACGTTACACGTAAGACA**ACTTG  
**TTGACATATTAGACAA****CGTGT**TAAACGTACCATAATCTCAAGTTTTAAATA  
CTATAATTGGCTATTTTTCTATCAATTTAAGTTTTTAAAAATGATGATAACT  
AACTAATTCAAACATATTTGTTTATAATTTGAAACAAAACAACATATTATG  
AAACCAATGCAACCCTACTCGTCTTATATACAGGTGTGATTATGATTGAAC  
CAGGTGGAATACGACATTTAAGTGAATATATAATCTCACTTTCCAAATAA  
AATGAAGAGTGAATTCTAAAAAAACCTCCAACCTTTTGCATATATATAAAA  
AATAATAAAATAAAATAAAAACTCCAATATTTTCGAAAATAAAGTTTTGCA  
TCCTACCATTACACTTTCTATCTACTTCACCATTACCATCCTTCTGAAAGT  
TTTTATTTTCAAACAGAAATTCATAGAAAATTCTAACAGTGGGGTGCAAA  
CCTTATATTTTCAAAGGTCGGGTGTTTTTTTTTATTTTCAGGCAAAGGTG  
GGGATGTTTTTAGAATTCACCCTAAAATGAATGAAAGAAAGTTATTCTAG  
AAGCAATTAAGGGATTTATTTTGGTAGCTGTGGCATGAGCCATTGGAGGT  
AGTTAGAGCTGCCACTCTCTAACCTTCCCTATCACTTACCTCTTTATATTTT  
ATATAACTTCTCTCCTATAAAGCTACACTTACGCATCACACATTCGTTCCAC  
TCAAACCTTGCCTTCTCCACCACTAACTCAACCCTACAAACCAAGGCAAA  
AAAAAATCATACACTGATTAACACACCAAAAAACAACCTTGTGTGAATG

<LcF3'H-Promoter

AGAAAATGACAAGTGAAAAGGGCAGCAAAGTGGCTCCACCAGTTTATAT  
AGGTGGCCGAGCTCGAGCCCCAGCCATCCGATTTGGAGAGTATGTAATTG  
CCTTGAATCCAACGGTATAGCACGAGTAACGGCTTTGTAATCATGCAGCC  
GTCAGTTGAAAGACGTGCACATTAATGCGTGTGGCACGAGGCGTGCCTG  
TGCTGGTTCAGTTATCTCCTGCATGATCGTCACATGTCAAACTGATGGGA  
TAGAATTTGAAAGAACGCGAAAACGACAATTCAAGACTAACTTTTACCAG  
CGAGCTCAAGCTCCAATTCGCAGAACGAAGTGAAGAGCTGGGGGGCTGAT  
GTTATGCGTATTTTTTAGACTCAGCAAATGGGCTGGTAAAAGCCTGATTGA  
AGCCCAACAAATCAACCCAATGAAGTGAAGTGAAGTGAAGTGAAGTGAAGT  
ATCAATGCTAAGCCCAGCGAACTATACAGCTCGCACTAGCGAGCTCGCAT  
CACATTGTTCTCAGATCGTTATGTAGTTCGCTCTATATACTTGGCTAAT  
CAGCGAGGCATAGCTCGAGATCGCTCAATACAATGTACAGCTCACTTAAC  
GATCAGTTAGACAAGAAAATTTTTAGAAAAGATAGTTACCCGATTTGAT  
CGTGATTCTCTCATAAGAATTAAGTAAATTTAAATTTGAACTCAGTCAA  
CATGATCTCGAATTTTACGGAGCAGTTTCTGATTTGACTCAAAGTGAATA  
ACAAGTGCATTCAATGTGAAATTTTCTTGTATTATTGCTACCTAACT  
GTAACGCCTCTTCCCTATAAATAGAGGCTGAATTCATTATAAACAGATAT  
ACAAACAATTCTATACTATCACTCTGTAGAATTTTTAGAGACAGT**CGTG**  
**GATGTAGGCGTACTCGCTGAATCACGTT**AAAAACCTTGTGTCTTTTTTG  
TGCTATTTTTATTCTTTGCCTTACTACTTGTGTTGCGTGTTTTCTATTCTATT  
GAGATTGATTGTAGGTATTGGGATTTGAGCTCTCGTCGATTAGAAATCAAC  
GTTAACTAGTATCAATTAATTAACAACCAATATCAACTAATTTAAAGAA  
AATATAAAAAGAAATGAAATCTAAATTAATAAATGAAATAACATCGAATTT  
TGAAAAGAAATAATATTAATTTCTAAATGAAATAACATCAAGTTCTAAA  
ACGAAAGAATATGAAATCCTAAAATGAAATAATTCTAAATTAATAAAAAG  
AAATAAAAATAGGAAATGATCAAAAATATATCCCAATTAATTTAGAAAGTT  
AAATCCTAATGAAATTTATTAATAAAAATCTTAAATTAACCAATTTTTT  
AAATTAAACTGTGGTTGACTCTTTTTGATCCTCACAGGTTTACGAAAATTC  
TTATAACAATATTTGAAAAGTTAAAATCCAAATAAAAAGAAACAAAGCT  
TGTATACATTAATTAATCACAACCTTTGTCGTTTAAAACAGGAATTAGGATC  
TGTAGATTTTTTGTTAATCTATGTAGTTATTGTAATGTGTAATTAATAGTTA  
AGAATTTTTTTCTAAAAATATATTATGAACTTTATAGGTTTGGTTATTTTTAT  
TAATTAAGTAAGATTATTAATCAATAATAATTTATAAATTTTTTTAATAA  
TTATATTTATAATTAATTTAAGAGTTATTATTGATAAATATTTTTATTTCATTC  
GAAGTGTAGATAGGCATAAATATAGGGAGAAGATTTATACACAGTGGATT  
AAGTATTGAGGTCAAGGTACGATCAATTCTCCACCCACCGGTCACCTGG  
GCATAATTGAACTACCAAGGCATAATTGAACATTGAAAGCACGTGGTACC  
TACCTCCTACGTGGCGTTTACCAAACAGCCTAACTCAAACCCCATGTTTT  
CACTTACCACTTCTTCACCTGTGCCATCCTCCACTCAGCCAAGCATGAACT  
CCCGTATTTCCACTTGCCACTTGCTCACCTACGCACCTCTCTCTTTTTCT



ATATATGCACTGTCCTCCACTCGACTCCTCTCAACTCTACTAGGTAGTTTC  
CCTCCTCCATCAATCCTTGTAACATAAACTACTTTTCAATCAAAACATG

<*LcDFR*-promoter

AGTTGCCCAACATTTAGGGCAGATTTGCTTTGCACAATCGCATTTTCTCCT  
TCTCACAGTCACAACATATAGAAATAAAATGTTAGCCTATATCAAGTATA  
AATTAAGAGATTGAGTTTTGCCTCTTTAAATTGTATTGTTGCTGGTATTTTT  
TTTTTTCCTTCGAGATATGCGTAGTTGAAAACACCTACATGTTGTGATTCCG  
CTACTATGATGACAGTCCATACAAAAAGAAATTAATATAAAAAAAGTTAT  
AGTTTGGAGAGATACTAAACAATATGATGCAAAATTTCAACACAATAAGC  
AATTCAAAATCCTTGAAATCCAACACGAAGGGAAATAAAAAAAATGAA  
AGAAGAAGAAAAAATTGCAAGTTTAACTGATACAAGACTTACATCTTCAT  
TATTGTTTTTTTGCTTTTTCAACAAAAAGTCAAAGAAGTTGGATCAAAG  
GGGTTGACTCTTATCTCAACTAGGTTGACATCTGGTGAGTCCTTAAATCA  
TGTGCGTGTAATCCTTCAACCGATCAACTTAAAACAAAAATAAAATACAA  
AATAAGAGAACATAAACAAATTACAAACCTAAAAAAGTTGACAGAATCG  
AAAAAAGGACAATGAAGACATGTATCTACCAACAAAAGAGCGATAAAAT  
TCCGGACAGTTGAACCACTAATATTAGTATTTAAGCGAAGACCATGAGA  
AGCCAGAATATTTACAACCTTGATTACTCTCATAATAAATATGAGTAACATG  
ATAGTGCGTTTGAAAATATAGAACAAACATTTACAAGAGGCCAAAAGGTG  
CCACGGAACATTGTGAAACTAAGTCTTTATTAAAGAAACCATATACAAGG  
AATCACATTCAATCATAATAGAAGACCAAGAAAGCCATAAGCATACTCAA  
TAGCTTTAATAACCGCTAGAATTTTAGCTTCATAAGCATATAAAATATATC  
CCTATAACTAGAACAAATGGAGACCCATTTGAGGATCCATCAATGTTGAC  
TTAACCACACCTGGAGGGGGGAGGATGCCAAAGTTGCAATGAACTTCCA  
AACACGTGCGGCACGATATATATGGACGAGGAGGAACATGCAAATTTCT  
CAAATTAACAAACTTTATTGTATTTTTTTTGTGCAAATTATTTTCATGACTT  
TGGAATAAAACAAAACCTTTAAATATTGATTAAAAAAAGAGAGATATTT  
TAGGTTTTGTAGAAAATAAAAGTGGAAGATAAACAATGTTGAATTCCAAA  
ATAGGTCTATAGTGTCCTTTCTTTTTTCTCTCTATTAATTTTAAATTAGTTT  
AAAATTATCATTTAAAAAAGAGAGAGAGAGAGAGAGAGAGAGAGAGAGAGAG  
CTAGCATCACTTGTTTTGAACTTGTAGCACTAACAGTTTTAGTAATACAAT  
TTATACAAAACCGTTGTGAAACGCCCTTGGTGCCCGATAAAGCCTTTCCCTC  
ACTAATAGAATTATATTACATATACACCAGTTTGAAAAGAAAATTATGGG  
CACCGTGGGGTCCCTCCGGCAGCTTCTATGTTCCCAATCACATCATATTATA  
TTTGTGCTCCTATTCCTGAGCACAGGTGGTCCAACTACAACCATTTAAA  
GCTACAACATCTGTGGTTGTTAATGTCTCCATCCAAGCGAGAAGATTAGA  
CTGAGCATGTGCCACCTACCACACTCGTGCCAAAATTGTTAGTTAACAA  
CGTGCCGGCCAGTCGGATGAGCTAAACCCCTACTGTGTTAGCTGGAAACT  
CGGAATAAAAAGTTCCCTTTACGTCTACTATATATAAACAGCCCGACTCCG  
ACAAAGTACCCCGAACATAGACGTCTCGCTTCACTTGTATCGATATATTA



CTCA**CACG**ATTATAGATATTAAGCTCTATTGAGGTAGGCATGTCGCATT  
TACTTGGGGCAAGTGCGTATAGTGCCACATCTATG

**Figure S1.** Nucleotide sequence of the promoters used in this work. The nucleotide sequence used in EMSA assay is indicated in bold. NAC core motif were indicated in red color. Translation start site (ATG) is shown in yellow box.

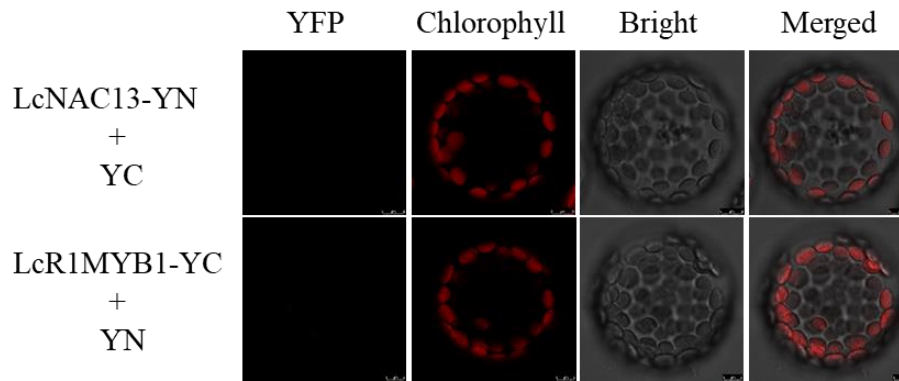

**Figure S2.** Bimolecular fluorescence complementation analysis. Fluorescence signal of YFP indicates protein-protein interaction. Combination of YN or YC with the corresponding LcNAC13 and LcR1MYB1 constructs were used as negative controls.

|          |                                                               |     |
|----------|---------------------------------------------------------------|-----|
| GmMYB176 | .....MSRASSAASGEIMLFGVRRVVD.....SMRKSVMN                      | 31  |
| HvMCB1   | ....ME..EEGGARK...AVLFRLEFGVEVRG.....AEEEEEDDAEP.MELKKSTSM    | 43  |
| HvMYBS3  | MTRRCSHCSSYNGHNSRTCFNRGVKIFGVRLTDG.....SIRKSASMG              | 42  |
| LcR1MYB1 | .....MN                                                       | 2   |
| OsMYBS2  | ....MEQHEEAERKPSFVIFRLEFGVEVRGGGGVDEEEYEEVEGGLFIKKSSSMP       | 55  |
| OsMYBS3  | MTRRCSHCSSHNGHNSRTCFNRGVKIFGVRLTDG.....SIRKSASMG              | 42  |
| ZmMYBSt1 | MTRRCSHCSSHNGHNSRTCFNRGVKIFGVHLLTDS.....AIRKSASMG             | 43  |
|          |                                                               |     |
| GmMYB176 | NLSQYE...HPLDA..TTTTNNKD..AVAAGYASADDAAPQNSGRHREERERKRGVPWTE  | 83  |
| HvMCB1   | NLASIG....FILPRGEASASHDKGYASDDGELASTPQLKRRR..RKAQERKKGIPWTE   | 96  |
| HvMYBS3  | NLSLLG...GSTSGGGGASPADVGHDA..AEGYASDDFVQGSS..SANRERKKGVWTE    | 95  |
| LcR1MYB1 | NLSQYE...CPQEN..INSNSNKDAAAAAGYASADDAVHNS...RASRERKRGVPWTE    | 53  |
| OsMYBS2  | NLTSID....PLP...VPADGGKRRASDDSELASG.QQKRRR..RKVQERKKGVWTE     | 103 |
| OsMYBS3  | NLSLLSSAAGSTSGG..ASPADGPDAAPTAADGYASDDFVQGSS..SATRDRKKGVWTE   | 98  |
| ZmMYBSt1 | NLSLLS..AGSTSGG..ASPADGPDLLAD.GGGGYASDDFVQGSS..SASRDRKK.VFLGL | 95  |
|          |                                                               |     |
| GmMYB176 | EEHKLFLVGLQKVGKGDWRGISRNEVVKTRTFTQVASHAQKYELRRSNLNRRRRSSLFDI  | 143 |
| HvMCB1   | EEHRRKFLGLQKLGKGDWRGISRNEVITRTATQVASHAQKYELRQTNPGKKKRRASLFDV  | 156 |
| HvMYBS3  | EEHRRFLGLQKLGKGDWRGISRNEVVSRTFTQVASHAQKYELRQANMSRRKRRSSLFDL   | 155 |
| LcR1MYB1 | EEHKLFLVGLQKVGKGDWRGISRNEVVKTRTFTQVASHAQKYELRRSNLNRRRRSSLFDI  | 113 |
| OsMYBS2  | EEHKKFLGLRQLGKGDWRGISRNEVITRTATQVASHAQKYELRQTNPGKKKRRASLFDV   | 163 |
| OsMYBS3  | EEHRRFLGLQKLGKGDWRGISRNEVVSRTFTQVASHAQKYELRQSNMTRRKRSSLFDM    | 158 |
| ZmMYBSt1 | EKNTGVFAGITKARERQWRGISRNEVVSRTFTQVASHAQKYELRQSNMTRRKRSSLFDM   | 155 |
|          |                                                               |     |
| GmMYB176 | TTITVSAIEMEEEQVQNQDTLCHSQQCFV.....FPAETS.KINGFPAMPVYQFGV      | 193 |
| HvMCB1   | G.....IPAGHGYDDQLPSPHVSQTKLA.....PAEKILHTDRGDVPLPSYS.         | 198 |
| HvMYBS3  | VPDES.DLPLPGNHEPEAQILNHPLEPPMEEEEEVESMESDTSVIAESSASAIMPENL    | 214 |
| LcR1MYB1 | TTDSVTAIEMEEEQESNK.TRSHPLPFPF.....LPETNKGVSQSVIPAFV..         | 161 |
| OsMYBS2  | .....VAECSDDQLPSPQSVGTFK.....PTQDIIHTDRGDVPILSY..             | 200 |
| OsMYBS3  | VPDESMDLPLPGGQEPETQVLNQPALPPPREEEVDSMESDTSAVAESSASAIMPDNL     | 218 |
| ZmMYBSt1 | VPDESMDLPLPGSQEPETSMNLQPPLEP.AVEEEVESMESDTSAVAESSGASALMFESL   | 214 |
|          |                                                               |     |
| GmMYB176 | GSSGVISVQGTGNPEELTLGQGNVEKH...NVPNKASTVSGIITPGSSSAIDP....     | 245 |
| HvMCB1   | ....EVIRGNNTNQMADELTDHAKK.....RSKFPTGMSLTAMAASGL....          | 240 |
| HvMYBS3  | QPSYPVLVPAYFSPFLQFSVFFWQNDGDDLGQGTHEIVKVPVHKSFPINVDLVMGMS     | 274 |
| LcR1MYB1 | ...VLPVP.VENPIDSITLQPNQSN...APANLIRPIVLPAPQPSAVVSDLNL...      | 210 |
| OsMYBS2  | ....PVARGFRGD..SVQVDELTEYVK.....RLKAAEDMSLSMISG.....          | 236 |
| OsMYBS3  | QSTYPVIVPAYFSPFLQFSVFFWQNKQDEDGVPQETHEIVKVPVHKSFPINVDLVMGMS   | 278 |
| ZmMYBSt1 | QPTYPMIVPAYFSPFLQFSVFFWPNQEDGGDLQPETHEIVKPVAVHSQNPINVDLVMGMS  | 274 |
|          |                                                               |     |
| GmMYB176 | .....PPTLSLGLSFSQDQRTSSRHSALHAMQCFS.NGDS..IISV                | 284 |
| HvMCB1   | .....ELAMSSSPSSILELSIGPPRHCAVD.AIKVL.....                     | 270 |
| HvMYBS3  | KLSIGDPKQDVTSTLSLKMVGQNRQSAFQANLPTRAQA.....                   | 314 |
| LcR1MYB1 | NLNMVDPSSLKLSLPSDQREASSRHSFQAMPSSLSSNGDSGSIISV                | 258 |
| OsMYBS2  | .....LEMASSSISSILELSIAPP.HCAIEAAIKVL.....                     | 265 |
| OsMYBS3  | KLSIGESNQETVSTLSLNLVGGQNRQSAFHANPTRAQA.....                   | 318 |
| ZmMYBSt1 | KLSIWEHQETVYTSLSLNLGGQNRQSAFHANPTRAQA.....                    | 314 |

**Figure S3** Sequence alignment of LcR1MYB1 with other plant R1-MYB proteins. The highly conserved SHAQK(Y/F) F motifs is underlined.
